# Supplementary material
Source: PubMed Central journal article supplement (PMC1366825)
Supplement: biophysj_105.060384_1.pdf [file biophysj_105.060384_1.pdf]

Figure 1: Secondary chemical shifts of C37 for both the N (panel a) and C' (panel b) were calculated based on the full spectral assignments at pH 6.25 and 25°C, the random coil data base, and corrections for sequence dependence.  $\Delta\delta$  is defined as the difference between the observed chemical shift and the corresponding random coil value.

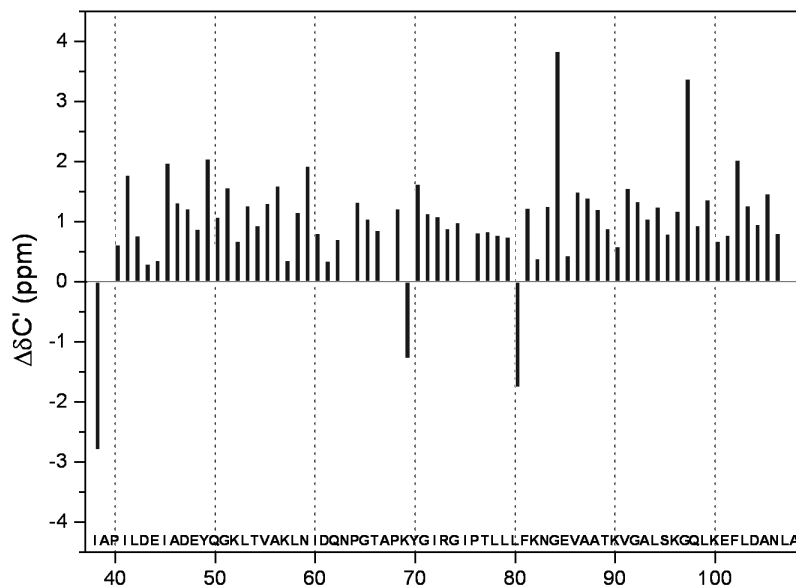

(a) Amide nitrogen chemical shifts

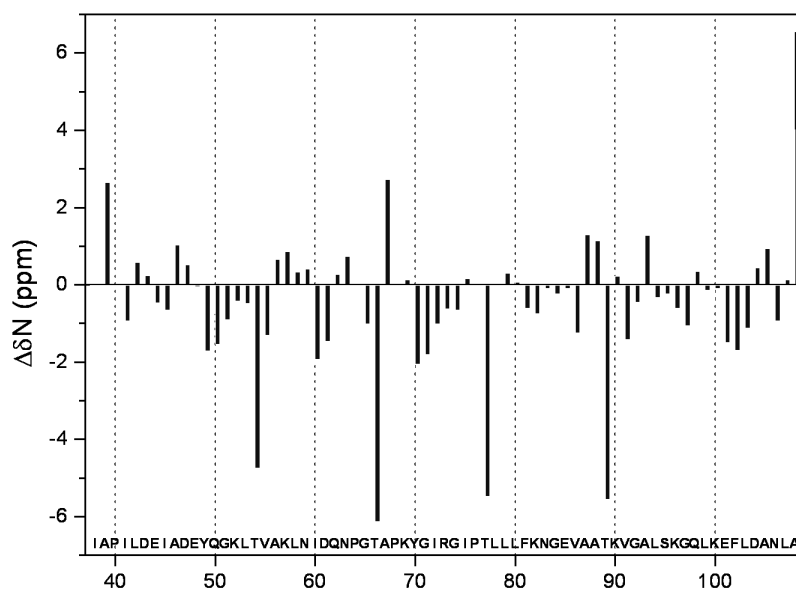

(b) Carbonyl chemical shifts
